# Supplementary material for: Diagnostic Efficacy of Serological Antibody Detection Tests for Hepatitis Delta Virus: A Systematic Review and Meta-Analysis
Source: MDPI journal article supplement (doi:10.3390/v15122345), 2023-11-29
Supplement: s1 [file s1]

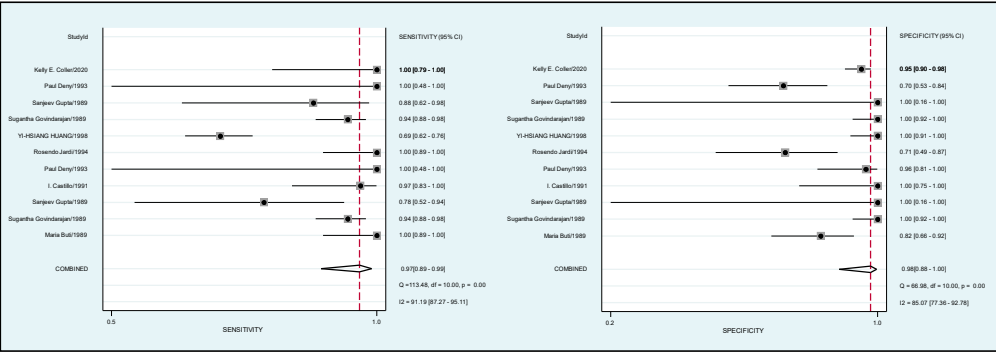

**Figure S1** Forest plots of the pooled sensitivity and specificity for anti-HDV IgG or IgM antibodies in diagnosis of HDV.

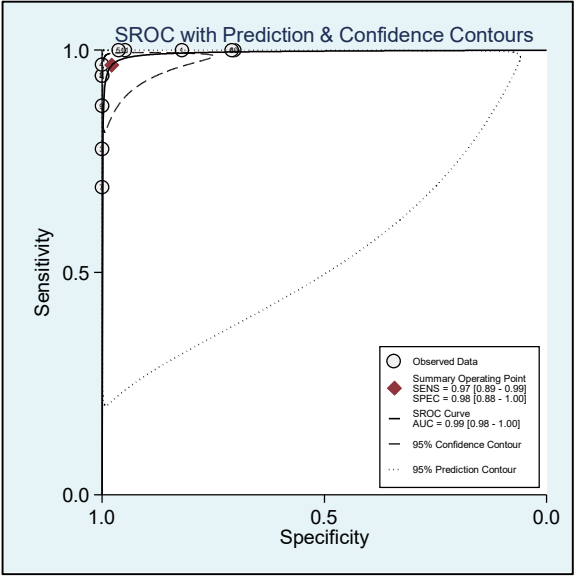

**Figure S2** The SROC curves of the serological testing of anti-HDV IgG or IgM antibodies.
